# Supplementary material for: A novel mechanism of heme degradation to biliverdin studied by QM/MM and QM calculations
Source: Royal Society of Chemistry journal article supplement (doi:10.1039/c8dt00064f), 2018-01-01
Supplement: c8dt00064f1.pdf [file c8dt00064f1.pdf]

## **Novel Mechanism of Heme Degradation to Biliverdin Studied by QM/MM and QM Calculations**

Fatemeh Sadat Alavi<sup>a</sup>, MahinGheidi<sup>a</sup>, Mansour Zahedi<sup>a,\*</sup>, Nasser Safari<sup>a,\*</sup>, Ulf Ryde<sup>b</sup>

<sup>a</sup>Department of Chemistry, Faculty of Sciences, ShahidBeheshti University, G.C., Evin, 19839-6313, Tehran, Iran, <sup>b</sup>Department of Theoretical Chemistry, Lund University, Chemical Centre, P.O. Box 124, SE-221 00 Lund, Sweden

Corresponding Authors

\*E-mail: [m-zahedi@sbu.ac.ir](mailto:m-zahedi@sbu.ac.ir), Phone: +98-21-29902889.

[n-safari@sbu.ac.ir](mailto:n-safari@sbu.ac.ir), Phone: +98-21-29902886.

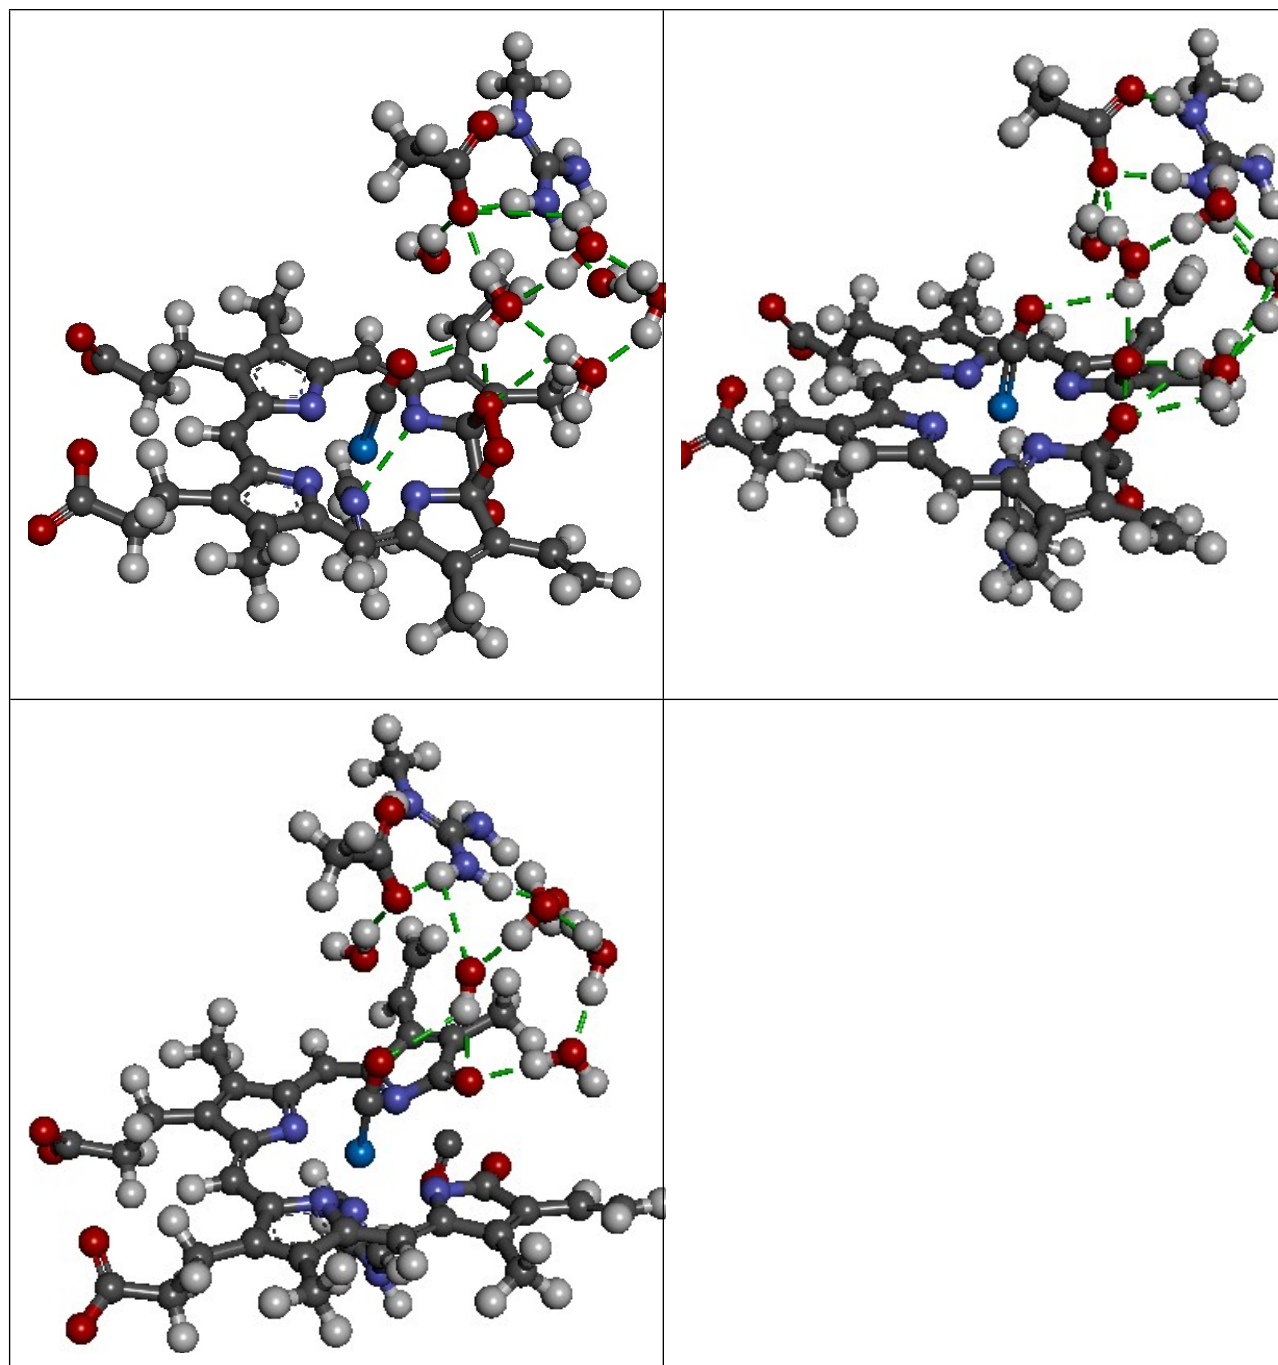

**Figure S1:** QM/MM optimized structure of the various intermediates For CO ligand

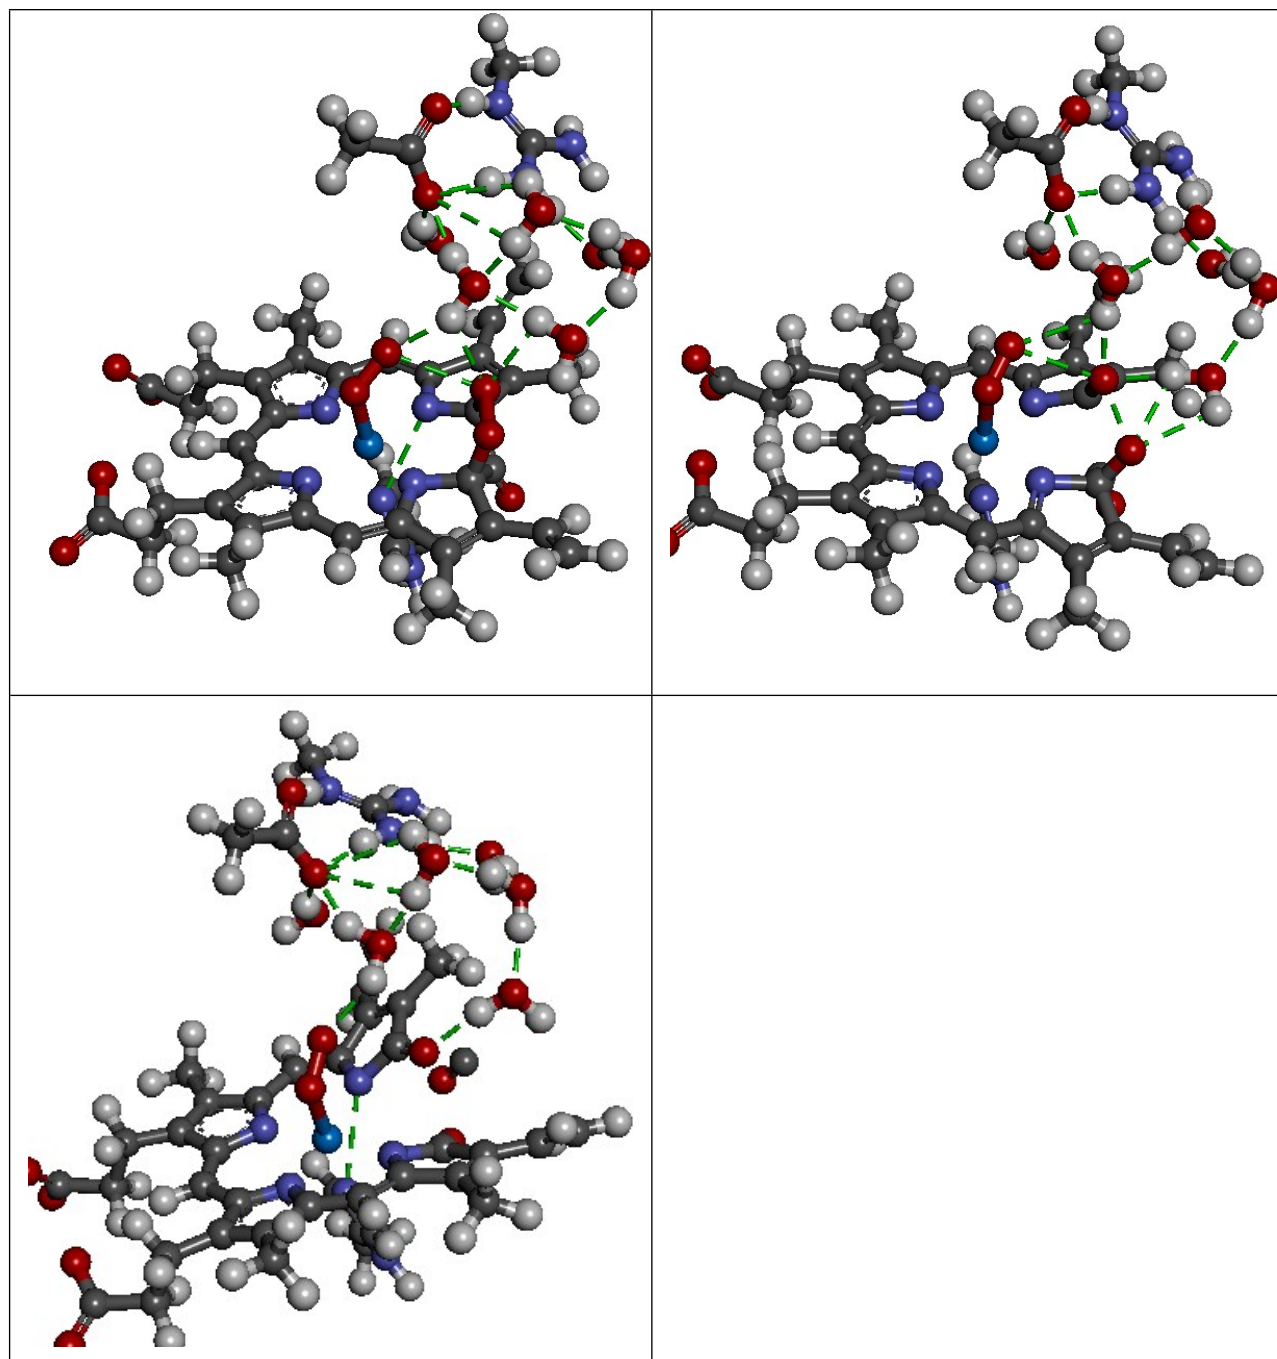

**Figure S2:** QM/MM optimized structure of the various intermediates For  $O_2$  ligand

**Table S1:** Relative energies (kcal/mol), obtained with different methods and basis sets for the QM/MM calculations with the H<sub>2</sub>O ligand. The various energies are defined in Eqns. 2 and 3, except that  $E_{\text{MM}} = E_{\text{MM12}} - E_{\text{MM1}}$ .

| Method | QM/MM | QM+ptch |       |       |       |       | Big-QM |                   |                 |                 | $E_{\text{tot}}$ |
|--------|-------|---------|-------|-------|-------|-------|--------|-------------------|-----------------|-----------------|------------------|
| DFT    | TPSS  | TPSS    | TPSS  | TPSS  | B3LYP | TPSS  |        | $E_{\text{disp}}$ | $E_{\text{MM}}$ | $E_{\text{bq}}$ |                  |
| Basis  | SV    | SV      | TZ    | QZ    | TZ    | SV    |        |                   |                 |                 |                  |
| 1      | 0.0   | 0.0     | 0.0   | 0.0   | 0.0   | 0.0   |        | 0.0               | 0.0             | 0.0             | 0.0              |
| Ts1    | 3.4   | 3.9     | 4.6   | 4.8   | 6.2   | 7.1   |        | -0.6              | -0.1            | 6.4             | 8.9              |
| 2      | -60.0 | -58.5   | -62.0 | -63.2 | -71.0 | -61.1 |        | 1.6               | -0.5            | -59.9           | -73.6            |
